# Supplementary material for: Proteomic profiling of extracellular vesicles allows for human breast cancer subtyping
Source: PubMed Central journal article supplement (PMC6722120; doi:10.1038/s42003-019-0570-8), 2019-09-03
Supplement: 42003_2019_570_MOESM1_ESM.pdf [file 42003_2019_570_MOESM1_ESM.pdf]

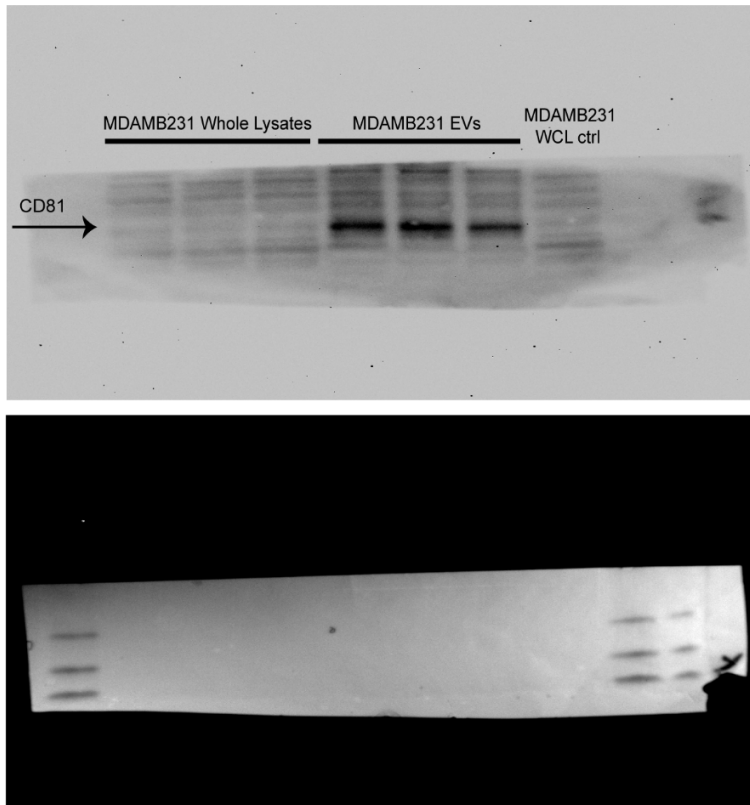

**Supplementary Figure 1. CD81 expression in MDAMB231 whole cell lysate and EV lysates. Uncropped blot image.**

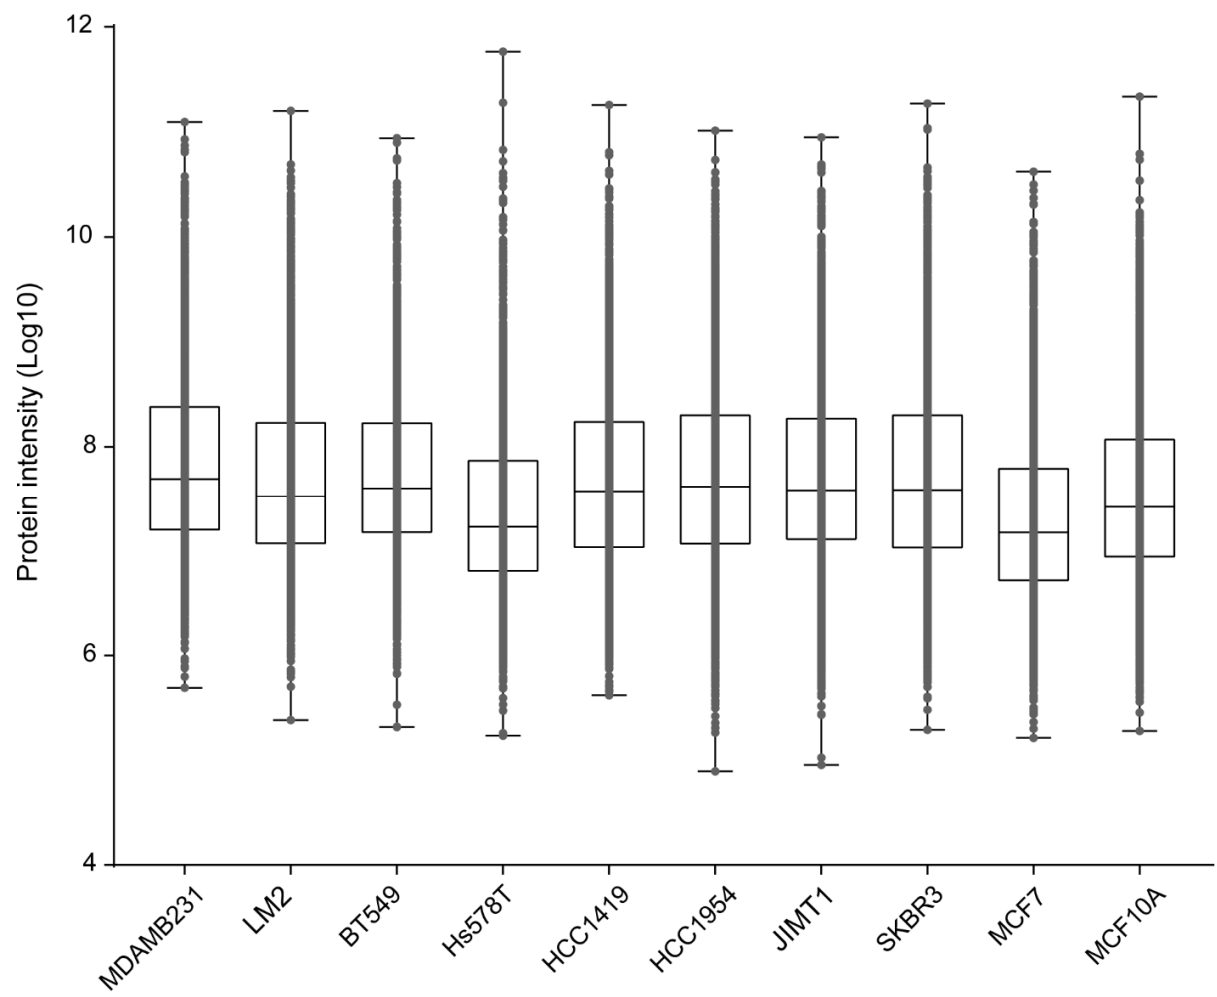

**Supplementary Figure 2. EV proteins intensities.** Boxplots illustrating the differences in protein abundances between all EV proteins per cell-line derived EVs.

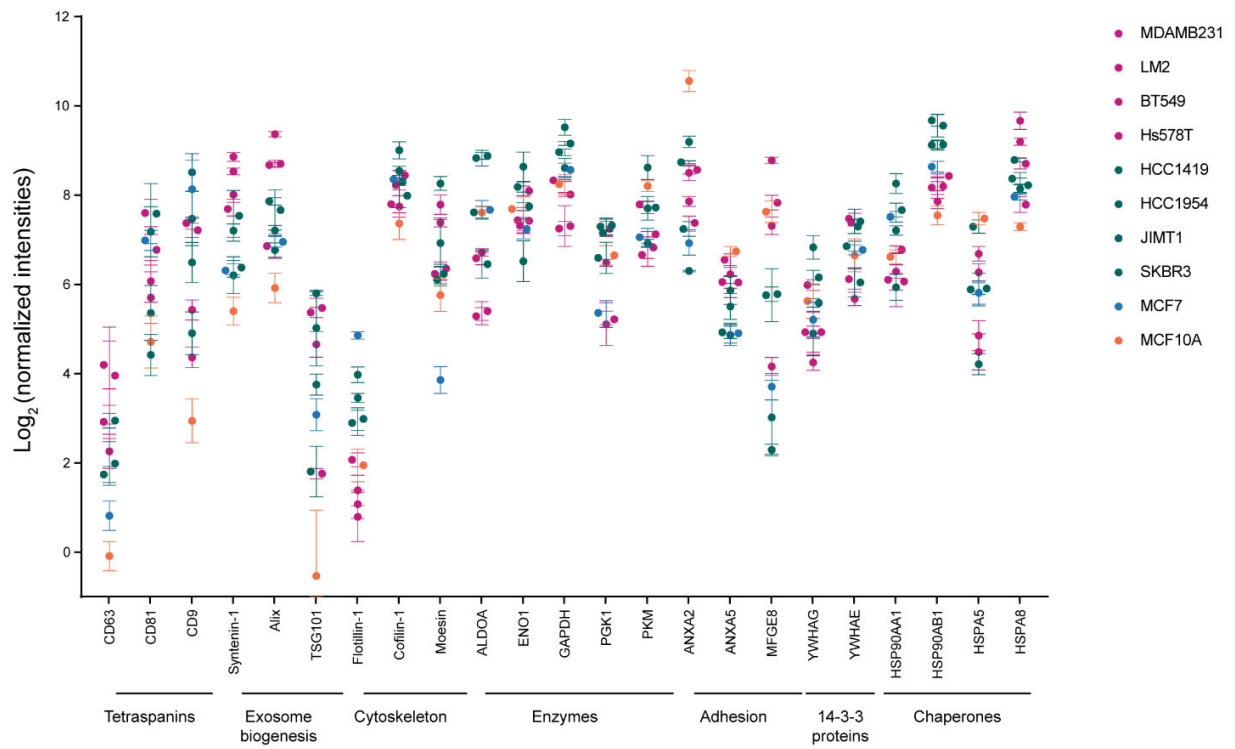

**Supplementary Figure 3. Common EV markers identified across all EV samples.** Enrichment of common EV protein markers measured across all EVs.

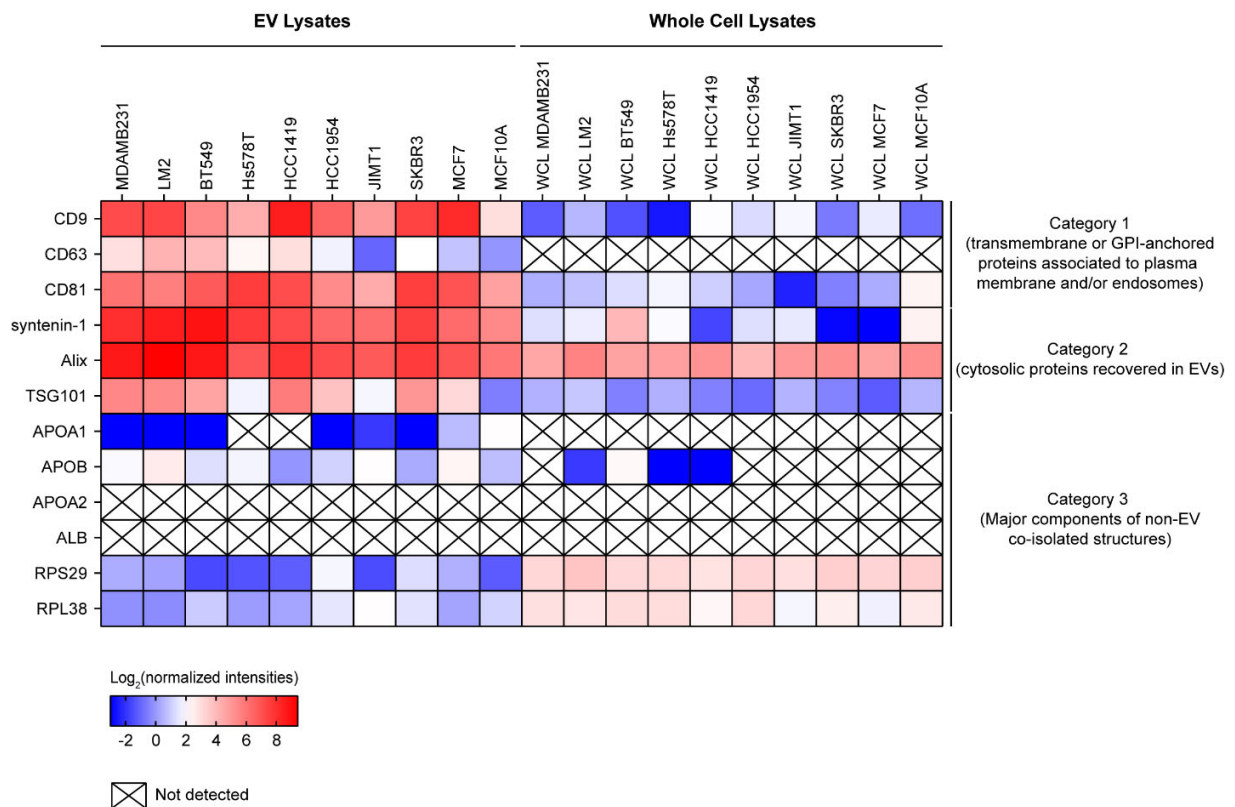

**Supplementary Figure 4. Protein content-based EV characterization according to the recommendations of the recently published MISEV2018 guidelines<sup>1</sup>.** Heatmap displaying the abundance of at least one of each of the three categories of protein markers detected in the EV preparations compared to the whole cell lysates.

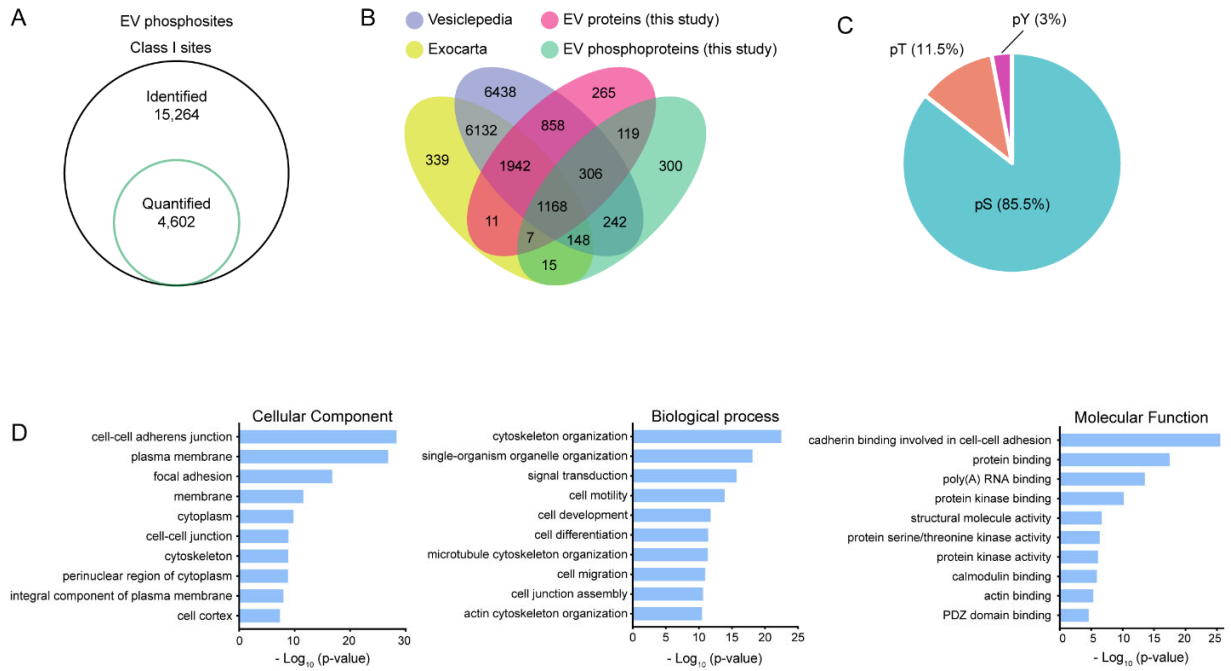

**Supplementary Figure 5. EV Phosphoproteome.** **A.** All phosphosites identified and quantified with a localization probability >0.75. **B.** Overlap between the EV phosphorylated proteins, EV proteins and proteins annotated in the Exocarta and Vesiclepedia databases. **C.** Distribution of identified phosphosites containing serine (pS), threonine (pT) and tyrosine (pY). **D.** Gene ontology enrichment analysis of the EV phosphoproteins. Only top 10 enriched terms (lowest p-values) are shown in each ontology.

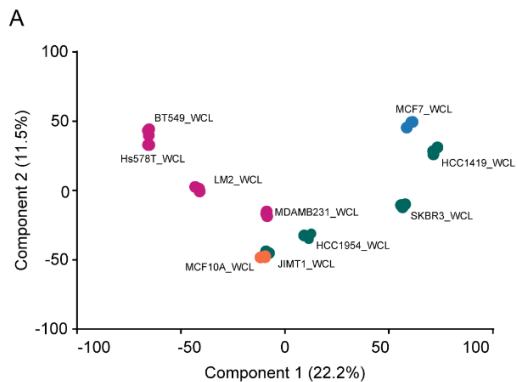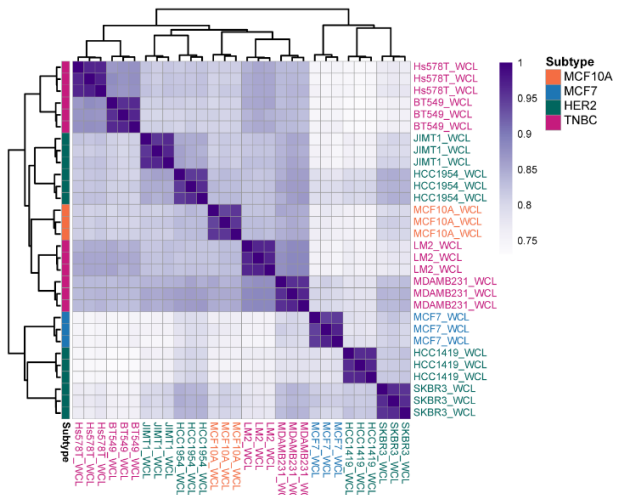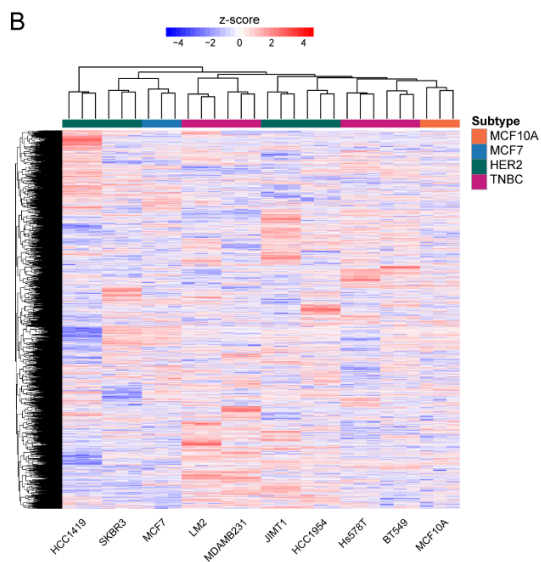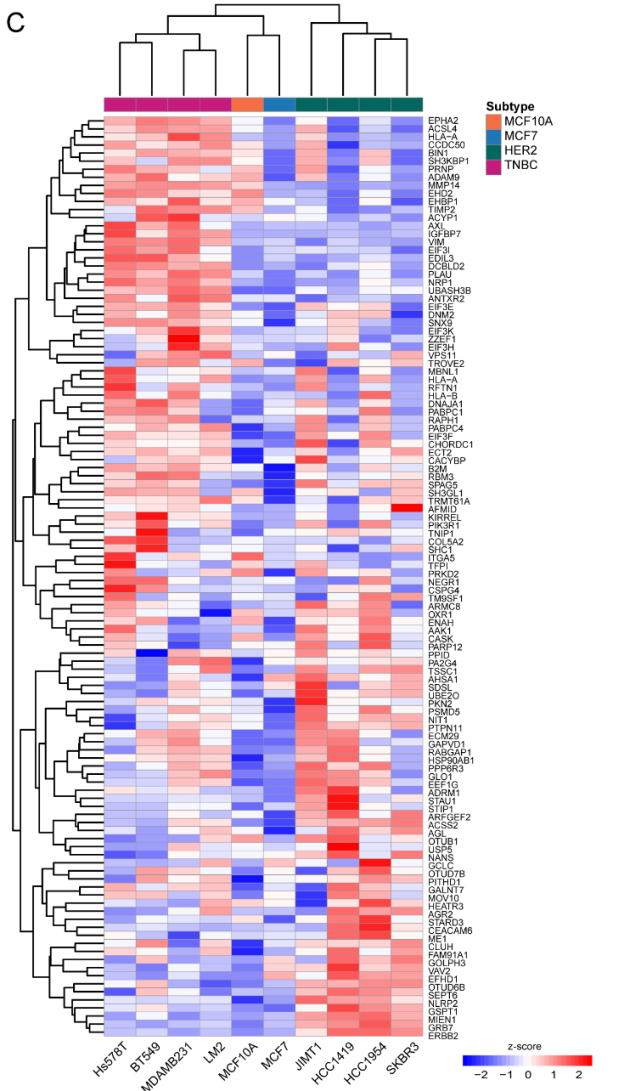

**Supplementary Figure 6. Proteomic profiling of whole cell lysates.** **A.** Principal component analysis (PCA) and hierarchical clustering (Pearson correlation) based on protein abundance. **B.** Heatmap of z-scored protein intensities of the differentially expressed proteins (ANOVA, FDR<0.05) **C.** Heatmap of the protein abundances (z-scored medians) of the TNBC and HER2-positive EV subtype-specific signatures as detected in the whole lysates of the different cell lines.

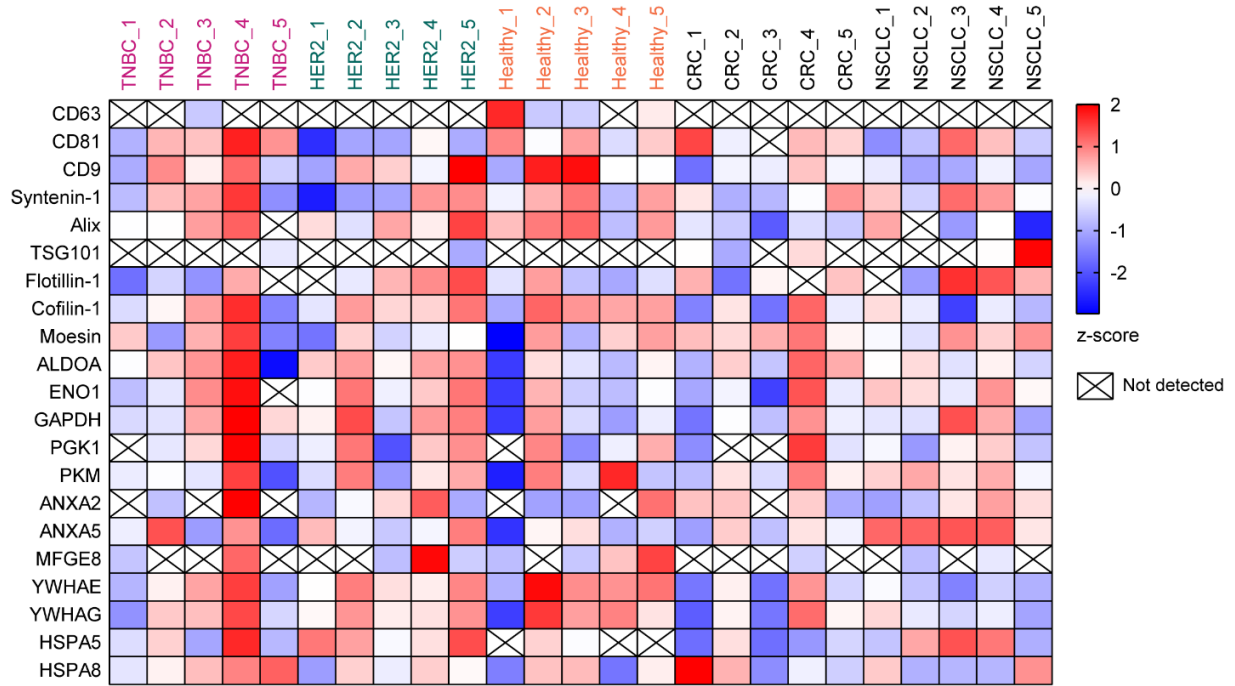

**Supplementary Figure 7. EV markers in the serum-derived EVs.** Comparison of the most common EV markers identified across the different patient-derived EVs.



**Supplementary Table 1a.** GSEA of EV proteins associated with the TNBC subtype.

| NAME                                                        | SIZE | ES         | NES       | NOM p-val  | FDR q-val (cutoff<0.05) |
|-------------------------------------------------------------|------|------------|-----------|------------|-------------------------|
| HALLMARK_EPITHELIAL_MESENCHYMAL_TRANSITION                  | 133  | 0,6540719  | 3,85466   | 0          | 0                       |
| HALLMARK_TNFA_SIGNALING_VIA_NFKB                            | 56   | 0,5475942  | 2,8069596 | 0          | 0                       |
| HALLMARK_INFLAMMATORY_RESPONSE                              | 57   | 0,5104872  | 2,5062516 | 0          | 0                       |
| HALLMARK_ANGIOGENESIS                                       | 17   | 0,6461675  | 2,3825557 | 0          | 0                       |
| HALLMARK_IL6_JAK_STAT3_SIGNALING                            | 20   | 0,5345839  | 2,137414  | 0          | 0                       |
| HALLMARK_UV_RESPONSE_DN                                     | 72   | 0,36810255 | 2,0255773 | 0          | 0                       |
| HALLMARK_COAGULATION                                        | 67   | 0,35265657 | 1,8565571 | 0          | 0,002917834             |
| HALLMARK_KRAS_SIGNALING_UP                                  | 53   | 0,3424629  | 1,7302884 | 0          | 0,006893382             |
| HALLMARK_IL2_STAT5_SIGNALING                                | 76   | 0,3367854  | 1,682648  | 0          | 0,010212418             |
| HALLMARK_MYOGENESIS                                         | 75   | 0,29578114 | 1,6497003 | 0          | 0,014501635             |
| HALLMARK_KRAS_SIGNALING_DN                                  | 24   | 0,36971372 | 1,5274572 | 0,05940594 | 0,032568324             |
| HALLMARK_APICAL_SURFACE                                     | 19   | 0,39960963 | 1,5025907 | 0,05       | 0,03325844              |
| KEGG_ECM_RECEPTOR_INTERACTION                               | 58   | 0,68450683 | 3,4805853 | 0          | 0                       |
| KEGG_CYTOKINE_CYTOKINE_RECEPTOR_INTERACTION                 | 36   | 0,63154024 | 2,742483  | 0          | 0                       |
| KEGG_HEMATOPOIETIC_CELL_LINEAGE                             | 18   | 0,6910933  | 2,6168797 | 0          | 0                       |
| KEGG_CELL_ADHESION_MOLECULES_CAMS                           | 52   | 0,4960803  | 2,4235094 | 0          | 0                       |
| KEGG_HEDGEHOG_SIGNALING_PATHWAY                             | 16   | 0,632326   | 2,2780492 | 0          | 0                       |
| KEGG_HYPERTROPHIC_CARDIOMYOPATHY_HCM                        | 39   | 0,43377253 | 1,9352672 | 0          | 0,004275001             |
| KEGG_DILATED_CARDIOMYOPATHY                                 | 40   | 0,41028127 | 1,9226185 | 0          | 0,004182468             |
| KEGG_COMPLEMENT_AND_COAGULATION_CASCADES                    | 23   | 0,43467057 | 1,774263  | 0          | 0,013973859             |
| KEGG_FOCAL_ADHESION                                         | 123  | 0,2921633  | 1,7647603 | 0          | 0,013210429             |
| KEGG_AXON_GUIDANCE                                          | 68   | 0,30095914 | 1,5747403 | 0          | 0,04199096              |
| GO_BLOOD_VESSEL_MORPHOGENESIS                               | 132  | 0,4749768  | 3,0534868 | 0          | 0                       |
| GO_EXTRACELLULAR_STRUCTURE_ORGANIZATION                     | 155  | 0,51751465 | 3,0283368 | 0          | 0                       |
| GO_MULTICELLULAR_ORGANISM_METABOLIC_PROCESS                 | 35   | 0,5923268  | 2,7073529 | 0          | 0                       |
| GO_BRANCHING_MORPHOGENESIS_OF_AN_EPITHELIAL_TUBE            | 46   | 0,5344634  | 2,6892874 | 0          | 0                       |
| GO_MULTIVESICULAR_BODY_ORGANIZATION                         | 27   | 0,62724566 | 2,651198  | 0          | 0                       |
| GO_MULTI_ORGANISM_ORGANELLE_ORGANIZATION                    | 22   | 0,6650792  | 2,642555  | 0          | 0                       |
| GO_MULTICELLULAR_ORGANISMAL_MACROMOLECULE_METABOLIC_PROCESS | 34   | 0,5981032  | 2,6414802 | 0          | 0                       |
| GO_ANGIOGENESIS                                             | 112  | 0,46464446 | 2,5782516 | 0          | 0                       |

|                                                                                |     |            |           |             |             |
|--------------------------------------------------------------------------------|-----|------------|-----------|-------------|-------------|
| GO_MULTI_ORGANISM_MEMBRANE_ORGANIZATION                                        | 26  | 0,62258494 | 2,5722544 | 0           | 0           |
| GO_COLLAGEN_FIBRIL_ORGANIZATION                                                | 24  | 0,6237296  | 2,5593307 | 0           | 0           |
| GO_EXOCRINE_SYSTEM_DEVELOPMENT                                                 | 16  | 0,662179   | 2,5359578 | 0           | 0           |
| GO_SPROUTING_ANGIOGENESIS                                                      | 17  | 0,6563773  | 2,4822295 | 0           | 3,03E-04    |
| GO_POSITIVE_REGULATION_OF_OSTEOBLAST_DIFFERENTIATION                           | 21  | 0,6507444  | 2,483986  | 0           | 3,23E-04    |
| GO_VASCULOGENESIS                                                              | 18  | 0,682346   | 2,49471   | 0           | 3,46E-04    |
| GO_TISSUE_REMODELING                                                           | 35  | 0,55216223 | 2,4950726 | 0           | 3,73E-04    |
| GO_POSITIVE_REGULATION_OF_OSSIFICATION                                         | 29  | 0,60827136 | 2,5107129 | 0           | 4,04E-04    |
| GO_ARTERY_MORPHOGENESIS                                                        | 18  | 0,66412765 | 2,4665298 | 0           | 5,34E-04    |
| GO_MORPHOGENESIS_OF_A_BRANCHING_STRUCTURE                                      | 56  | 0,47195292 | 2,4819207 | 0           | 5,65E-04    |
| GO_VASCULATURE_DEVELOPMENT                                                     | 165 | 0,41238368 | 2,4274163 | 0           | 0,00117318  |
| GO_TISSUE_MORPHOGENESIS                                                        | 183 | 0,32239702 | 2,3943727 | 0           | 0,001523794 |
| GO_NEGATIVE_REGULATION_OF_CYTOKINE_PRODUCTION                                  | 58  | 0,44710025 | 2,358784  | 0           | 0,002016261 |
| GO_ENDODERMAL_CELL_DIFFERENTIATION                                             | 21  | 0,5644342  | 2,2764976 | 0,009259259 | 0,003029655 |
| GO_FORMATION_OF_PRIMARY_GERM_LAYER                                             | 49  | 0,4784209  | 2,2600026 | 0           | 0,003274219 |
| GO_CARTILAGE_DEVELOPMENT                                                       | 35  | 0,5093435  | 2,241029  | 0           | 0,003535487 |
| GO_CELL_SEPARATION_AFTER_CYTOKINESIS                                           | 16  | 0,64576644 | 2,2345152 | 0           | 0,003921339 |
| GO_SUBSTRATE_ADHESION_DEPENDENT_CELL_SPREADING                                 | 25  | 0,53278077 | 2,2163155 | 0           | 0,004617054 |
| GO_CONNECTIVE_TISSUE_DEVELOPMENT                                               | 50  | 0,44570002 | 2,222353  | 0           | 0,004622033 |
| GO_HETEROPHILIC_CELL_CELL_ADHESION_VIA_PLASMA_MEMBRANE_CELL_ADHESION_MOLECULES | 16  | 0,62963915 | 2,1985648 | 0           | 0,00490929  |
| GO_REGULATION_OF_OSSIFICATION                                                  | 49  | 0,45304665 | 2,1914806 | 0           | 0,005038133 |
| GO_CHONDROCYTE_DIFFERENTIATION                                                 | 16  | 0,6082823  | 2,1852598 | 0           | 0,005704458 |
| GO_ENDODERM_FORMATION                                                          | 23  | 0,54011697 | 2,1721396 | 0           | 0,006135693 |
| GO_ENDODERM_DEVELOPMENT                                                        | 33  | 0,47536287 | 2,1616013 | 0           | 0,006641376 |
| GO_CARDIAC_SEPTUM_DEVELOPMENT                                                  | 24  | 0,51715547 | 2,1560419 | 0           | 0,006687572 |
| GO_INTEGRIN_MEDIATED_SIGNALING_PATHWAY                                         | 53  | 0,40288806 | 2,143148  | 0           | 0,007242638 |
| GO_EYE_MORPHOGENESIS                                                           | 36  | 0,4561761  | 2,1320772 | 0           | 0,007893788 |
| GO_REGULATION_OF_BIOMINERAL_TISSUE_DEVELOPMENT                                 | 22  | 0,54851544 | 2,105997  | 0           | 0,008175036 |
| GO_FOREBRAIN_CELL_MIGRATION                                                    | 23  | 0,53290296 | 2,1115015 | 0           | 0,008283093 |
| GO_CARDIAC_CHAMBER_MORPHOGENESIS                                               | 26  | 0,50573015 | 2,096423  | 0           | 0,008503365 |
| GO_POSITIVE_REGULATION_OF_SMALL_GTPASE_MEDIATED_SIGNAL_TRANSDUCTION            | 19  | 0,56095976 | 2,1163259 | 0           | 0,008513179 |
| GO_EXTRACELLULAR_MATRIX_DISASSEMBLY                                            | 36  | 0,47907078 | 2,0686362 | 0           | 0,009945151 |
| GO_REGULATION_OF_INTERFERON_GAMMA_PRODUCTION                                   | 17  | 0,548228   | 2,0525174 | 0           | 0,011888543 |
| GO_NEGATIVE_REGULATION_OF_BMP_SIGNALING_PATHWAY                                | 15  | 0,55521375 | 2,052625  | 0,006024096 | 0,012178508 |

|                                                                                           |     |            |           |             |             |
|-------------------------------------------------------------------------------------------|-----|------------|-----------|-------------|-------------|
| GO_VENTRICULAR_SEPTUM_DEVELOPMENT                                                         | 15  | 0,57592624 | 2,033159  | 0           | 0,012420778 |
| GO_SKELETAL_SYSTEM_MORPHOGENESIS                                                          | 50  | 0,41100687 | 2,0339324 | 0           | 0,012582812 |
| GO_REGULATION_OF_NEURON_DIFFERENTIATION                                                   | 184 | 0,30735973 | 2,0277557 | 0           | 0,01272953  |
| GO_CARDIAC_CHAMBER_DEVELOPMENT                                                            | 40  | 0,4031798  | 2,0360866 | 0           | 0,012742041 |
| GO_ENDOTHELIAL_CELL_DIFFERENTIATION                                                       | 38  | 0,4311473  | 2,0344603 | 0           | 0,012856351 |
| GO_ARTERY_DEVELOPMENT                                                                     | 28  | 0,49421722 | 2,0366902 | 0           | 0,013031633 |
| GO_GASTRULATION                                                                           | 62  | 0,39745998 | 2,0218575 | 0           | 0,013088268 |
| GO_CELL_FATE_COMMITMENT                                                                   | 34  | 0,439164   | 2,0369241 | 0,011235955 | 0,013334693 |
| GO_REGULATION_OF_PATHWAY_RESTRICTED_SMAD_PROTEIN_PHOSPHORYLATION                          | 26  | 0,484446   | 2,008837  | 0           | 0,014279375 |
| GO_EMBRYONIC_CRANIAL_SKELETON_MORPHOGENESIS                                               | 15  | 0,5740053  | 1,9799829 | 0,00591716  | 0,016566362 |
| GO_VIRION_ASSEMBLY                                                                        | 31  | 0,46352884 | 1,9749091 | 0           | 0,016763268 |
| GO_NEURAL_CRESCENT_CELL_MIGRATION                                                         | 15  | 0,5325115  | 1,975111  | 0           | 0,016907355 |
| GO_POSITIVE_REGULATION_OF_AXON_EXTENSION                                                  | 18  | 0,5147161  | 1,9716411 | 0,007246377 | 0,016953152 |
| GO_CARDIAC_VENTRICLE_DEVELOPMENT                                                          | 27  | 0,46217382 | 1,9645522 | 0           | 0,01727359  |
| GO_SKELETAL_SYSTEM_DEVELOPMENT                                                            | 120 | 0,35246718 | 1,9583784 | 0           | 0,017609386 |
| GO_LENS_DEVELOPMENT_IN_CAMERA_TYPE_EYE                                                    | 22  | 0,52501196 | 1,9570183 | 0           | 0,017674407 |
| GO_REGULATION_OF_EPITHELIAL_CELL_MIGRATION                                                | 70  | 0,35567284 | 1,9516323 | 0           | 0,018269025 |
| GO_REGULATION_OF_OSTEOBLAST_DIFFERENTIATION                                               | 34  | 0,44161913 | 1,9523704 | 0           | 0,018352933 |
| GO_VASCULAR_PROCESS_IN_CIRCULATORY_SYSTEM                                                 | 46  | 0,3952751  | 1,9369646 | 0           | 0,019040536 |
| GO_DEVELOPMENTAL_GROWTH                                                                   | 110 | 0,30247438 | 1,9387968 | 0           | 0,019216577 |
| GO_CELL_SUBSTRATE_ADHESION                                                                | 83  | 0,3712283  | 1,934201  | 0           | 0,019352075 |
| GO_ENDOTHELIUM_DEVELOPMENT                                                                | 46  | 0,40493783 | 1,930801  | 0           | 0,019742817 |
| GO_ORGAN_MORPHOGENESIS                                                                    | 229 | 0,295131   | 1,9265401 | 0           | 0,019984988 |
| GO_HEART_MORPHOGENESIS                                                                    | 56  | 0,41074994 | 1,9233264 | 0           | 0,020214641 |
| GO_DEVELOPMENTAL_GROWTH_INVOLVED_IN_MORPHOGENESIS                                         | 42  | 0,40527952 | 1,9171137 | 0           | 0,020365592 |
| GO_REGULATION_OF_CYTOKINE_PRODUCTION_INVOLVED_IN_IMMUNE_RESPONSE                          | 23  | 0,4537234  | 1,9174014 | 0           | 0,020669557 |
| GO_REGULATION_OF_BMP_SIGNALING_PATHWAY                                                    | 27  | 0,45164397 | 1,9122537 | 0           | 0,021088649 |
| GO_CARDIAC_MUSCLE_TISSUE_DEVELOPMENT                                                      | 41  | 0,4172347  | 1,9056252 | 0           | 0,021103678 |
| GO_REGULATION_OF_CELLULAR_RESPONSE_TO_GROWTH_FACTOR_STIMULUS                              | 84  | 0,34836173 | 1,9056629 | 0           | 0,021345494 |
| GO_SEMAPHORIN_PLEXIN_SIGNALING_PATHWAY                                                    | 19  | 0,5130929  | 1,894141  | 0,007936508 | 0,021367747 |
| GO_REGULATION_OF_TRANSMEMBRANE_RECEPTOR_PROTEIN_SERINE_THREONINE_KINASE_SIGNALING_PATHWAY | 76  | 0,36296502 | 1,8923814 | 0           | 0,021436442 |
| GO_POSITIVE_REGULATION_OF_PATHWAY_RESTRICTED_SMAD_PROTEIN_PHOSPHORYLATION                 | 22  | 0,48464292 | 1,8963794 | 0,007936508 | 0,02147812  |
| GO_CRANIAL_SKELETAL_SYSTEM_DEVELOPMENT                                                    | 17  | 0,5284534  | 1,9020303 | 0,007142857 | 0,021485602 |
| GO_MESODERM_MORPHOGENESIS                                                                 | 29  | 0,46256396 | 1,8977747 | 0           | 0,021505445 |

|                                                                                |     |            |           |             |             |
|--------------------------------------------------------------------------------|-----|------------|-----------|-------------|-------------|
| GO_TUBE_MORPHOGENESIS                                                          | 105 | 0,355346   | 1,9057034 | 0           | 0,021588374 |
| GO_POSITIVE_REGULATION_OF_NEURON_DIFFERENTIATION                               | 99  | 0,3515843  | 1,8980005 | 0           | 0,021796059 |
| GO_POSITIVE_REGULATION_OF_EPITHELIAL_CELL_MIGRATION                            | 43  | 0,40869358 | 1,8791727 | 0           | 0,022793131 |
| GO_AMINOGLYCAN_BIOSYNTHETIC_PROCESS                                            | 31  | 0,4376072  | 1,8751099 | 0,013157895 | 0,023205558 |
| GO_NEGATIVE_REGULATION_OF_SMALL_GTPASE_MEDIATED_SIGNAL_TRANSDUCTION            | 18  | 0,50944227 | 1,8731558 | 0           | 0,023284312 |
| GO_BONE_MORPHOGENESIS                                                          | 19  | 0,49676108 | 1,8710419 | 0,006802721 | 0,02330387  |
| GO_EMBRYONIC_SKELETAL_SYSTEM_MORPHOGENESIS                                     | 22  | 0,4743787  | 1,8680375 | 0           | 0,023505922 |
| GO_POSITIVE_REGULATION_OF_CELL_DEVELOPMENT                                     | 156 | 0,29687214 | 1,8608824 | 0           | 0,024234653 |
| GO_EYE_DEVELOPMENT                                                             | 93  | 0,32584113 | 1,863473  | 0           | 0,024324903 |
| GO_POSITIVE_REGULATION_OF_SMOOTH_MUSCLE_CELL_MIGRATION                         | 15  | 0,53083307 | 1,8579521 | 0,006756757 | 0,024560856 |
| GO_REGULATION_OF_AXON_GUIDANCE                                                 | 16  | 0,52336305 | 1,8537909 | 0           | 0,025046702 |
| GO_REGULATION_OF_VASOCONSTRICTION                                              | 16  | 0,49390244 | 1,8509748 | 0,021428572 | 0,025570145 |
| GO_POSITIVE_REGULATION_OF_PEPTIDYL_TYROSINE_PHOSPHORYLATION                    | 47  | 0,395815   | 1,8493499 | 0           | 0,025582233 |
| GO_GLAND_MORPHOGENESIS                                                         | 41  | 0,38839436 | 1,8421752 | 0           | 0,026498444 |
| GO_ENDOTHELIAL_CELL_MIGRATION                                                  | 27  | 0,43486574 | 1,8311411 | 0,009174312 | 0,026813734 |
| GO_DEVELOPMENTAL_CELL_GROWTH                                                   | 32  | 0,4221701  | 1,8288609 | 0           | 0,026862297 |
| GO_POSITIVE_REGULATION_OF_AXONOGENESIS                                         | 30  | 0,4234353  | 1,8329262 | 0           | 0,02687297  |
| GO_REGULATION_OF_CELL_ADHESION_MEDIATED_BY_INTEGRIN                            | 20  | 0,48865306 | 1,834026  | 0           | 0,026973195 |
| GO_NEURAL_CREST_CELL_DIFFERENTIATION                                           | 23  | 0,44258225 | 1,8358388 | 0,008849558 | 0,026981045 |
| GO_POSITIVE_REGULATION_OF_RESPONSE_TO_WOUNDING                                 | 34  | 0,4088752  | 1,8230587 | 0           | 0,027250363 |
| GO_REGULATION_OF_LEUKOCYTE_APOPTOTIC_PROCESS                                   | 25  | 0,45156035 | 1,8233553 | 0,01923077  | 0,02739927  |
| GO_REGULATION_OF_CARDIAC_MUSCLE_TISSUE_DEVELOPMENT                             | 17  | 0,5020205  | 1,8185846 | 0,007246377 | 0,02773774  |
| GO_POSITIVE_REGULATION_OF_LYMPHOCYTE_DIFFERENTIATION                           | 20  | 0,48061365 | 1,8102537 | 0,008474576 | 0,029000327 |
| GO_CAMERA_TYPE_EYE_MORPHOGENESIS                                               | 28  | 0,43277907 | 1,8011658 | 0           | 0,029057924 |
| GO_EMBRYONIC_ORGAN_DEVELOPMENT                                                 | 99  | 0,33302614 | 1,807578  | 0           | 0,029098589 |
| GO_POSITIVE_REGULATION_OF_ADAPTIVE_IMMUNE_RESPONSE                             | 20  | 0,4760458  | 1,8020257 | 0,007936508 | 0,02912987  |
| GO_REGULATION_OF_NEURON_PROJECTION_DEVELOPMENT                                 | 157 | 0,30769774 | 1,7927284 | 0           | 0,029210052 |
| GO_SMAD_PROTEIN_SIGNAL_TRANSDUCTION                                            | 20  | 0,46221605 | 1,7993208 | 0           | 0,029211683 |
| GO_MESENCHYMAL_CELL_DIFFERENTIATION                                            | 43  | 0,36668444 | 1,8022667 | 0           | 0,02924067  |
| GO_NEGATIVE_REGULATION_OF_CYTOKINE_SECRETION                                   | 15  | 0,51615787 | 1,7940462 | 0,006329114 | 0,029398143 |
| GO_AXON_EXTENSION                                                              | 18  | 0,500325   | 1,8026762 | 0,00862069  | 0,02944632  |
| GO_NEGATIVE_REGULATION_OF_NERVOUS_SYSTEM_DEVELOPMENT                           | 87  | 0,33975178 | 1,7969854 | 0           | 0,029456303 |
| GO_MOVEMENT_IN_ENVIRONMENT_OF_OTHER_ORGANISM_INVOLVED_IN_SYMBIOTIC_INTERACTION | 53  | 0,35942292 | 1,8036844 | 0           | 0,029565819 |
| GO_POSITIVE_REGULATION_OF_PRODUCTION_OF_MOLECULAR_MEDIATOR_OF_IMMUNE_RESPONSE  | 19  | 0,48128766 | 1,7941167 | 0,007751938 | 0,029625054 |

|                                                                                                    |     |            |           |             |             |
|----------------------------------------------------------------------------------------------------|-----|------------|-----------|-------------|-------------|
| GO_REGULATION_OF_EXTRINSIC_APOPTOTIC_SIGNALING_PATHWAY                                             | 65  | 0,3370369  | 1,7859701 | 0           | 0,02966904  |
| GO_ORGAN_GROWTH                                                                                    | 15  | 0,5196824  | 1,7866691 | 0,007246377 | 0,029861068 |
| GO_CELL_MATRIX_ADHESION                                                                            | 61  | 0,35076648 | 1,7806145 | 0           | 0,030271184 |
| GO_REGULATION_OF_CELLULAR_RESPONSE_TO_TRANSFORMING_GROWTH_FACTOR_BETA_STIMULUS                     | 40  | 0,37921208 | 1,781406  | 0           | 0,030378135 |
| GO_RESPONSE_TO_MECHANICAL_STIMULUS                                                                 | 65  | 0,34307963 | 1,7783157 | 0           | 0,030485334 |
| GO GRANULOCYTE MIGRATION                                                                           | 16  | 0,49145204 | 1,7819988 | 0,012903226 | 0,030565925 |
| GO_TUBE_DEVELOPMENT                                                                                | 183 | 0,2718963  | 1,7769675 | 0           | 0,030648641 |
| GO_GLIAL_CELL_MIGRATION                                                                            | 19  | 0,5030886  | 1,7662284 | 0,015748031 | 0,03219082  |
| GO_POSITIVE_REGULATION_OF_NEURON_PROJECTION_DEVELOPMENT                                            | 91  | 0,3497157  | 1,7687044 | 0           | 0,03219396  |
| GO_NEGATIVE_REGULATION_OF_RESPONSE_TO_CYTOKINE_STIMULUS                                            | 15  | 0,50689816 | 1,7668531 | 0,012903226 | 0,032218214 |
| GO_PATTERN_SPECIFICATION_PROCESS                                                                   | 75  | 0,3404747  | 1,7614292 | 0           | 0,032930486 |
| GO_RESPONSE_TO_TRANSFORMING_GROWTH_FACTOR_BETA                                                     | 63  | 0,3455403  | 1,7602364 | 0           | 0,032940038 |
| GO_NEURON_PROJECTION_EXTENSION                                                                     | 25  | 0,44608828 | 1,756777  | 0,010526316 | 0,033366963 |
| GO_NEURON_MIGRATION                                                                                | 33  | 0,39508873 | 1,7547618 | 0           | 0,033616193 |
| GO_NEGATIVE_REGULATION_OF_NEURON_DIFFERENTIATION                                                   | 65  | 0,36493754 | 1,7499985 | 0           | 0,03447974  |
| GO TAXIS                                                                                           | 151 | 0,29789746 | 1,7436026 | 0           | 0,035418764 |
| GO_CEREBRAL_CORTEX_DEVELOPMENT                                                                     | 40  | 0,35888454 | 1,7414166 | 0,01754386  | 0,0356777   |
| GO_EMBRYONIC_SKELETAL_SYSTEM_DEVELOPMENT                                                           | 29  | 0,4015737  | 1,7318122 | 0           | 0,0366899   |
| GO_REGULATION_OF_COAGULATION                                                                       | 36  | 0,39152828 | 1,7327425 | 0           | 0,036874816 |
| GO_NEGATIVE_REGULATION_OF_CELLULAR_RESPONSE_TO_GROWTH_FACTOR_STIMULUS                              | 52  | 0,33384714 | 1,7187158 | 0           | 0,040121127 |
| GO_CELL_CELL_ADHESION_VIA_PLASMA_MEMBRANE_ADHESION_MOLECULES                                       | 57  | 0,33394924 | 1,7145991 | 0           | 0,040719513 |
| GO_AMINOGLYCAN_CATABOLIC_PROCESS                                                                   | 24  | 0,41859517 | 1,7149304 | 0           | 0,04098805  |
| GO_EMBRYONIC_ORGAN_MORPHOGENESIS                                                                   | 64  | 0,35104787 | 1,7096045 | 0           | 0,04117971  |
| GO_MESENCHYME_DEVELOPMENT                                                                          | 55  | 0,35275102 | 1,7109884 | 0           | 0,041202597 |
| GO_RESPONSE_TO_OXYGEN_LEVELS                                                                       | 111 | 0,27736694 | 1,7031478 | 0           | 0,042961754 |
| GO_TELENCEPHALON_DEVELOPMENT                                                                       | 73  | 0,30854952 | 1,6984441 | 0           | 0,043842174 |
| GO_CELL_RECOGNITION                                                                                | 39  | 0,36040285 | 1,691827  | 0           | 0,044478707 |
| GO_REGULATION_OF_RESPONSE_TO_CYTOKINE_STIMULUS                                                     | 50  | 0,33914018 | 1,6921713 | 0           | 0,044716846 |
| GO_NEGATIVE_REGULATION_OF_CELL_DEVELOPMENT                                                         | 101 | 0,31139967 | 1,6925831 | 0           | 0,044887584 |
| GO_CEREBRAL_CORTEX_CELL_MIGRATION                                                                  | 17  | 0,47708827 | 1,6818987 | 0,014492754 | 0,046057012 |
| GO_CARDIAC_MUSCLE_CELL_DIFFERENTIATION                                                             | 23  | 0,41165754 | 1,6831218 | 0,016949153 | 0,046110537 |
| GO_REGULATION_OF_PEPTIDYL_TYROSINE_PHOSPHORYLATION                                                 | 68  | 0,30306798 | 1,685333  | 0           | 0,046143707 |
| GO_NEGATIVE_REGULATION_OF_TRANSMEMBRANE_RECEPTOR_PROTEIN_SERINE_THREONINE_KINASE_SIGNALING_PATHWAY | 43  | 0,34716094 | 1,6770866 | 0,02        | 0,046254415 |
| GO_LEUKOCYTE_DIFFERENTIATION                                                                       | 70  | 0,32009467 | 1,6755494 | 0           | 0,046319    |

|                                                        |     |            |           |             |             |
|--------------------------------------------------------|-----|------------|-----------|-------------|-------------|
| GO_POSITIVE_REGULATION_OF_LOCOMOTION                   | 169 | 0,28631788 | 1,6805739 | 0           | 0,04632646  |
| GO_REGULATION_OF_MAPK_CASCADE                          | 220 | 0,24141857 | 1,6837081 | 0           | 0,04634834  |
| GO_REGULATION_OF_ERK1_AND_ERK2_CASCADE                 | 69  | 0,3238348  | 1,6774836 | 0           | 0,046513483 |
| GO_NEGATIVE_REGULATION_OF_CELL_DIFFERENTIATION         | 153 | 0,27044898 | 1,6775863 | 0           | 0,046808083 |
| GO_SENSORY_ORGAN_MORPHOGENESIS                         | 62  | 0,3327704  | 1,6707563 | 0           | 0,04732897  |
| GO_NEGATIVE_REGULATION_OF_DEVELOPMENTAL_PROCESS        | 209 | 0,24543591 | 1,6714435 | 0           | 0,047469974 |
| GO_NEGATIVE_REGULATION_OF_CELL_PROJECTION_ORGANIZATION | 60  | 0,32950357 | 1,6610754 | 0           | 0,04892702  |
| GO_POSITIVE_REGULATION_OF_NERVOUS_SYSTEM_DEVELOPMENT   | 134 | 0,30929932 | 1,6616591 | 0           | 0,049103152 |
| GO_NEGATIVE_REGULATION_OF_CHEMOTAXIS                   | 15  | 0,46363083 | 1,6640562 | 0,013245033 | 0,049116466 |
| GO_ODONTOGENESIS                                       | 33  | 0,37186462 | 1,663018  | 0,011494253 | 0,049146734 |
| GO_REGULATION_OF_CELL_GROWTH                           | 144 | 0,2819293  | 1,6621399 | 0           | 0,04922694  |

**Supplementary Table 1b.** GSEA of EV proteins associated with the HER2-positive subtype.

| NAME                                                                                              | SIZE | ES         | NES       | NOM p-val   | FDR q-val (cutoff<0.05) |
|---------------------------------------------------------------------------------------------------|------|------------|-----------|-------------|-------------------------|
| KEGG_PROTEASOME                                                                                   | 39   | 0,6328617  | 1,9376595 | 0           | 9,29E-04                |
| KEGG_MTOR_SIGNALING_PATHWAY                                                                       | 27   | 0,646495   | 1,8876325 | 0           | 0,003312365             |
| KEGG_AMINOACYL_TRNA_BIOSYNTHESIS                                                                  | 25   | 0,6369281  | 1,8271948 | 0,001101322 | 0,007869756             |
| KEGG_AMINO_SUGAR_AND_NUCLEOTIDE_SUGAR_METABOLISM                                                  | 30   | 0,584942   | 1,7579488 | 0           | 0,017485362             |
| KEGG_INSULIN_SIGNALING_PATHWAY                                                                    | 65   | 0,5273585  | 1,7205372 | 0           | 0,024213506             |
| GO_REGULATION_OF_CELLULAR_AMINO_ACID_METABOLIC_PROCESS                                            | 46   | 0,6477915  | 2,0642884 | 0           | 0,001574048             |
| GO_REGULATION_OF_TRANSLATIONAL_INITIATION                                                         | 49   | 0,6429345  | 2,0295384 | 0           | 0,001181092             |
| GO_FORMATION_OF_TRANSLATION_PREINITIATION_COMPLEX                                                 | 19   | 0,7525628  | 2,013563  | 0           | 0,002104858             |
| GO_REGULATION_OF_CELLULAR_AMINE_METABOLIC_PROCESS                                                 | 53   | 0,624812   | 2,012556  | 0           | 0,001578644             |
| GO_NIK_NF_KAPPAB_SIGNALING                                                                        | 60   | 0,6080574  | 1,9672834 | 0           | 0,003318744             |
| GO_PROTEIN_MODIFICATION_BY_SMALL_PROTEIN_REMOVAL                                                  | 41   | 0,6203065  | 1,925892  | 0           | 0,007109539             |
| GO_REGULATION_OF_CELLULAR_KETONE_METABOLIC_PROCESS                                                | 71   | 0,5924128  | 1,9201525 | 0           | 0,006660051             |
| GO_ANAPHASE_PROMOTING_COMPLEX_DEPENDENT_CATABOLIC_PROCESS                                         | 57   | 0,59065825 | 1,8951299 | 0           | 0,009691925             |
| GO_FC_EPSILON_RECEPTOR_SIGNALING_PATHWAY                                                          | 79   | 0,5595973  | 1,8696026 | 0           | 0,01265652              |
| GO_NEGATIVE_REGULATION_OF_PROTEIN_MODIFICATION_BY_SMALL_PROTEIN_CONJUGATION_OR_REMOVAL            | 84   | 0,5556396  | 1,8676054 | 0           | 0,011708366             |
| GO_AMINO_ACID_ACTIVATION                                                                          | 32   | 0,6164461  | 1,8605653 | 0           | 0,011940118             |
| GO_ANTIGEN_PROCESSING_AND_PRESENTATION_OF_EXOGENOUS_PEPTIDE_ANTIGEN_VIA_MHC_CLASS_I               | 50   | 0,5830832  | 1,8561842 | 0           | 0,011669364             |
| GO_REGULATION_OF_PROTEIN_UBIQUITINATION_INVOLVED_IN_UBIQUITIN_DEPENDENT_PROTEIN_CATABOLIC_PROCESS | 69   | 0,56845564 | 1,8507189 | 0           | 0,012417492             |
| GO_REGULATION_OF_INTRACELLULAR_STEROID_HORMONE_RECEPTOR_SIGNALING_PATHWAY                         | 23   | 0,66132444 | 1,8434689 | 0,001109878 | 0,013284902             |
| GO_FC_RECEPTOR_SIGNALING_PATHWAY                                                                  | 116  | 0,5300428  | 1,8343831 | 0           | 0,015038286             |
| GO_INNATE_IMMUNE_RESPONSE_ACTIVATING_CELL_SURFACE_RECEPTOR_SIGNALING_PATHWAY                      | 69   | 0,5627703  | 1,8341705 | 0           | 0,014098394             |
| GO_REGULATION_OF_RNA_STABILITY                                                                    | 92   | 0,53563136 | 1,8127203 | 0           | 0,019877614             |
| GO_POSITIVE_REGULATION_OF_LIGASE_ACTIVITY                                                         | 67   | 0,5499852  | 1,7896364 | 0           | 0,028276332             |
| GO_ANTIGEN_RECEPTOR_MEDIATED_SIGNALING_PATHWAY                                                    | 84   | 0,5305962  | 1,7798052 | 0           | 0,031033333             |
| GO_TRNA_METABOLIC_PROCESS                                                                         | 62   | 0,5498893  | 1,7770387 | 0           | 0,030905416             |
| GO_T_CELL_RECEPTOR_SIGNALING_PATHWAY                                                              | 78   | 0,5321811  | 1,7763419 | 0           | 0,029659087             |
| GO_MYELOID_CELL_DEVELOPMENT                                                                       | 16   | 0,67675817 | 1,7735121 | 0           | 0,029426103             |
| GO_TUMOR_NECROSIS_FACTOR_MEDIATED_SIGNALING_PATHWAY                                               | 61   | 0,54488856 | 1,7715914 | 0           | 0,028870353             |
| GO_NEGATIVE_REGULATION_OF_CANONICAL_WNT_SIGNALING_PATHWAY                                         | 72   | 0,5332362  | 1,7702878 | 0           | 0,028228415             |
| GO_ANTIGEN_PROCESSING_AND_PRESENTATION_OF_PEPTIDE_ANTIGEN_VIA_MHC_CLASS_I                         | 64   | 0,5447548  | 1,7674999 | 0           | 0,02823807              |
| GO_PROTEIN_POLYUBIQUITINATION                                                                     | 104  | 0,51345074 | 1,7649174 | 0           | 0,028155642             |
| GO_REGULATION_OF_CELL_CYCLE_PHASE_TRANSITION                                                      | 139  | 0,5093335  | 1,764354  | 0           | 0,027317923             |
| GO_TRANSCRIPTION_COUPLED_NUCLEOTIDE_EXCISION_REPAIR                                               | 40   | 0,5740359  | 1,738614  | 0           | 0,039114345             |
| GO_ANTIGEN_PROCESSING_AND_PRESENTATION_OF_PEPTIDE_ANTIGEN                                         | 106  | 0,51183224 | 1,7276947 | 0           | 0,044369012             |
| GO_REGULATION_OF_LIGASE_ACTIVITY                                                                  | 76   | 0,51939005 | 1,7243586 | 0           | 0,044761814             |
| GO_IMMUNE_RESPONSE_REGULATING_CELL_SURFACE_RECEPTOR_SIGNALING_PATHWAY                             | 136  | 0,50059575 | 1,7218251 | 0           | 0,045181643             |
| GO_POSITIVE_REGULATION_OF_PROTEIN_MODIFICATION_BY_SMALL_PROTEIN_CONJUGATION_OR_REMOVAL            | 101  | 0,5027726  | 1,7185997 | 0           | 0,04611859              |
| GO_NEGATIVE_REGULATION_OF_GTPASE_ACTIVITY                                                         | 20   | 0,6261651  | 1,7166989 | 0,001103753 | 0,045800176             |





|                                                                                |        |     |    |          |          |                                                                                                                                                |
|--------------------------------------------------------------------------------|--------|-----|----|----------|----------|------------------------------------------------------------------------------------------------------------------------------------------------|
| Degradation of beta catenin(N)                                                 | 0.0017 | 18  | 10 | 2,84E-05 | 3,41E-04 | URP6,CSNK1D,CSNK1E,GSX3B,GSX3A,CSNK1A1,DRV13,APC,SKP1,CTNNB1                                                                                   |
| ECM-receptor interaction(K)                                                    | 0.0075 | 82  | 23 | 3,18E-05 | 3,82E-04 | HSPG2,FN1,CDL1A1,ITGB1,ITGB8,ITGB4,ITGA4,ITGA3,ITGA2,ITGA6,ITGA5,ITGA9,SDC4,SDC1,CD47,CD44,LAJMC2,LAJMB1,TNC,DAG1,CD6A3                        |
| Epstein-Barr virus infection(I)                                                | 0.0188 | 204 | 42 | 4,49E-05 | 5,39E-04 | PSMD6,ANK2,PSMD2,PSMD1,CSNK2A2,SNZ1,LYN,IFI202C,IRXBL3,STAT3,PSMCL1,MAP3K7,SPN,CAAM1,CSNK2B,TP53,SNW1,PTMA,CD44,GSX3B,YWHA8,TNFAIP3,YWHAQ,D    |
| Syndecan-2 mediated signaling events(N)                                        | 0.0029 | 32  | 13 | 4,89E-05 | 5,86E-04 | FN1,ITGB1,ITGA2,SRC,EPH41,SDC2,CASK,CAV2,PRKCD,NF1,EZR,SDSIP,MAPK3                                                                             |
| Neurotrophin signaling pathway(K)                                              | 0.0111 | 121 | 29 | 5,41E-05 | 6,21E-04 | ART2,FRS2,NGF,IKK8,RAPI8,CRKL,TP53,GRB2,CAIM1,GAB1,SORT1,RAF1,PSEN1,GSX3B,MAPK3,PRKCD,BRAF,IRS1,MAP2K2,MAP2K7,SOS1,PTPN11,SPSKA3,CAMK4,ARH     |
| FGF signaling pathway(N)                                                       | 0.0043 | 47  | 16 | 5,65E-05 | 6,21E-04 | FRS2,SRC,SDC2,GRB2,GAB1,CTTN,PAK4,SSH1,CTNND1,CDH1,SOS1,PTPN11,FGFR4,FGFR3,NCAM1,MAPK3                                                         |
| Endosomal Sorting Complex Required For Transport (ESCRT)(R)                    | 0.0026 | 28  | 12 | 5,72E-05 | 6,29E-04 | VPS37D,TSO10,UBA52,VPS29,VPS4B,VPS4A,CHMP4C,CHMP4B,CHMP2B,CHMP2A,CHMP3,CHMP5                                                                   |
| Gap junction trafficking and regulation(N)                                     | 0.0008 | 9   | 7  | 5,79E-05 | 6,37E-04 | MYO6,AP2M1,SRC,GA1,GSX1,DAB2,TIP1                                                                                                              |
| Neutrophil degranulation(R)                                                    | 0.0362 | 393 | 68 | 6,08E-05 | 6,68E-04 | PSMD2,PSMD1,IGFAP1,JUP,PGAM1,VAMP8,PSMA5,PSMA2,PAFAH1B2,AFEH,TOM1,TICAM2,IST1,S100A9,RAP1B,ARPC5,EEF2,HSP90A1,SNAP23,PGM2,ITGAV,DSF,HSP        |
| ERBB forward signaling(N)                                                      | 0.0035 | 38  | 14 | 7,14E-05 | 7,63E-04 | 90A1,EPHE1,CSNK2B,DSN1,ARCCD,CAP1,CD47,CD44,DYNCL11,HUWE1,SRP14,OS1,CD97,ADAM10,PPA,VCL,VCP,PSEN1,KIF2R,MAPK14,CYFIP1,PRKCD,DYNCL11,S100A      |
| Posttranslational regulation of adherens junction stability and disassembly(N) | 0.0044 | 48  | 16 | 7,19E-05 | 7,63E-04 | 11,CDL13,PTGDR,GP,ANKA2,JA1,MTOR1,PSPA18,BA1B1,PARC,UBR4,PRX,ONX1,CS,RSB10,IMPH2,RSB13,PTH1,HA-C,HA-A,TSUB,ALDOA,SYP,SDCBP,HSP48               |
| Signaling by ERBB2(R)                                                          | 0.004  | 43  | 15 | 7,30E-05 | 7,63E-04 | IGFAP1,JUP,EGFR,DSP,MET,SRC,PTPN11,RIN2,ADAM10,RET,CTNND1,CDH1,ROBO1,PDN1,CTNNA1,CTNNB1,GN13                                                   |
| LKB1 signaling events(N)                                                       | 0.004  | 43  | 15 | 7,30E-05 | 7,63E-04 | EGFR,HSP90A1,NRG1,SRC,STUB1,CD37,GRB7,GRB2,WAS1,MAP4K4,PKN,EFNB2,EFNB1,MAPK3                                                                   |
| Regulation of mRNA stability by proteins that bind AU-rich elements(R)         | 0.008  | 87  | 23 | 7,63E-05 | 7,63E-04 | SFN,STK26,HSP90A1,CD37,TP53,GSX3B,YWHA8,YWHAQ,MTOR,EZR,RPTOR,TSC2,MARK4,MARK2,AKT1S1                                                           |
| Mitotic Prometaphase(R)                                                        | 0.0091 | 99  | 25 | 7,77E-05 | 7,77E-04 | PSMD8,PSMD2,PSMD1,PSME4,PSMA5,PSMA3,PSMA2,PSMCL1,EXOSC2,KHSRP,YWHA8,PSMB10,MAPK14,NUP214,PRKCD,UBA52,HNRNP0,HSPA1B,EEF4G1,DCP1A,ZFP36L1,       |
| VEGF3 signaling in lymphatic endothelium(N)                                    | 0.0023 | 25  | 11 | 9,16E-05 | 9,16E-04 | HSP48,HSP81                                                                                                                                    |
| Axon guidance(N)                                                               | 0.0163 | 177 | 37 | 9,25E-05 | 9,25E-04 | NUP107,CSNK2A2,NCAPG,CDC48,INCEP,CENPA,CENPF,TAOK1,CASC5,CDC20,CSNK2B,DSN1,ERCC6L,PDS5B,NUP88,NUP2,NUDC,CLIP1,CDL1,RPS27,RANBP2,KIF18A,CKAP5,C |
| Signaling events regulated by Ret tyrosine kinase(N)                           | 0.0036 | 39  | 14 | 9,33E-05 | 9,33E-04 | IASP1,CLASP2                                                                                                                                   |
| Mitotic Metaphase and Anaphase(R)                                              | 0.0151 | 164 | 35 | 9,58E-05 | 9,58E-04 | FN1,CDL1A1,ITGB1,ITGA4,ITGA2,ITGA5,GRB2,MAPK34,MAP2K4,SOS1,MAPK3                                                                               |
|                                                                                |        |     |    |          |          | DPS12,ITGB1,MET,SRC,EPH8,EPH8,EPH4,EPHA2,PTK2,NRP1,GNAB,PAK6,PAK2,PAK4,RAF1,SSH3,SSH1,GSX3B,IKK,ARHGFE12,PARD3,CFI2,CF1,PLXNA2,PLXNA1,SRGAP    |
|                                                                                |        |     |    |          |          | 2,SRGAP1,CK1B,SRGAP2,PTPN11,SRB1,CK1B,EPH2,EFNB1,CAAMC1,CAAMC5,MAPK3                                                                           |
|                                                                                |        |     |    |          |          | FRS2,SRC,GRB7,PTK2,GRB2,GAB1,SHANK3,RET,IRS1,IRS2,SOS1,PTPN11,PKN,MAPK3                                                                        |
|                                                                                |        |     |    |          |          | NUP107,PSMD8,PSMD2,PSMD1,PSME4,CDC48,PSMA5,PSMA3,PSMA2,INCEP,CENPA,CENPF,TAOK1,PSMCI,CASC5,ANAPC3,CDCC20,CDCC23,CDCC26,DSN1,ERCC6L,PDS5B,      |
|                                                                                |        |     |    |          |          | MB10,NUP88,UBA52,NUP2,NUDC,CLIP1,RPS27,LMNA,RANBP2,KIF18A,CKAP5,CLASP1,CLASP2                                                                  |

**Supplementary Table 3.** List of a subpopulation of the TNBC- and HER2-EV subtype specific signatures quantified in human serum-derived EVs.

| Gene names    | Intensity TNBC_1 | Intensity TNBC_2 | Intensity TNBC_3 | Intensity TNBC_4 | Intensity TNBC_5 | Intensity HER2_1 | Intensity HER2_2 | Intensity HER2_3 | Intensity HER2_4 | Intensity HER2_5 | Intensity healthy_1 | Intensity healthy_2 | Intensity healthy_3 | Intensity healthy_4 | Intensity healthy_5 | Intensity CRC_1 | Intensity CRC_2 | Intensity CRC_3 | Intensity CRC_4 | Intensity CRC_5 | Intensity NSCLC_1 | Intensity NSCLC_2 | Intensity NSCLC_3 | Intensity NSCLC_4 | Intensity NSCLC_5 |          |
|---------------|------------------|------------------|------------------|------------------|------------------|------------------|------------------|------------------|------------------|------------------|---------------------|---------------------|---------------------|---------------------|---------------------|-----------------|-----------------|-----------------|-----------------|-----------------|-------------------|-------------------|-------------------|-------------------|-------------------|----------|
| <b>NRP1</b>   | 25,02606         | NaN              | 26,3014          | NaN              | NaN              | NaN              | NaN              | NaN              | NaN              | NaN              | NaN                 | NaN                 | NaN                 | NaN                 | NaN                 | NaN             | 23,87624        | 25,77623        | 25,55403        | NaN             | NaN               | NaN               | NaN               | NaN               | NaN               |          |
| <b>ACSL4</b>  | 25,16196         | NaN              | NaN              | 25,73547         | NaN              | 24,42304         | 25,1495          | NaN              | NaN              | NaN              | NaN                 | 25,92846            | NaN                 | 25,46476            | NaN                 | NaN             | NaN             | NaN             | NaN             | NaN             | NaN               | NaN               | NaN               | NaN               | 26,76572          | NaN      |
| <b>PLAU</b>   | NaN              | NaN              | NaN              | 25,00642         | NaN              | NaN              | NaN              | NaN              | NaN              | NaN              | NaN                 | NaN                 | NaN                 | NaN                 | NaN                 | NaN             | NaN             | NaN             | NaN             | NaN             | NaN               | NaN               | NaN               | 24,84245          | NaN               | NaN      |
| <b>PABPC1</b> | NaN              | 25,08869         | NaN              | 26,19691         | NaN              | 21,98402         | NaN              | NaN              | 24,63029         | NaN              | NaN                 | NaN                 | NaN                 | NaN                 | NaN                 | NaN             | NaN             | NaN             | NaN             | NaN             | NaN               | NaN               | NaN               | NaN               | 24,48155          | NaN      |
| <b>EPHA2</b>  | 26,30966         | NaN              | 26,41917         | NaN              | NaN              | 24,54239         | NaN              | NaN              | 26,30156         | 25,30163         | 26,93775            | NaN                 | NaN                 | NaN                 | NaN                 | 24,78786        | NaN             | NaN             | NaN             | NaN             | NaN               | NaN               | NaN               | NaN               | 23,91771          | NaN      |
| <b>DNAJA1</b> | 26,24131         | NaN              | 26,36264         | NaN              | 26,85567         | NaN              | 25,12609         | NaN              | NaN              | NaN              | 26,01329            | NaN                 | NaN                 | 25,96585            | 24,4829             | NaN             | 25,07382        | NaN             | 24,90035        | 25,87159        | NaN               | NaN               | NaN               | NaN               | NaN               | NaN      |
| <b>PABPC4</b> | 25,07594         | NaN              | 25,11319         | NaN              | 19,61047         | NaN              | NaN              | NaN              | NaN              | NaN              | NaN                 | 24,46619            | 25,42002            | NaN                 | 25,16921            | 24,98251        | NaN             | 24,3686         | NaN             | NaN             | NaN               | NaN               | NaN               | NaN               | 25,85436          |          |
| <b>ADAM9</b>  | NaN              | 24,63771         | NaN              | 28,32307         | NaN              | NaN              | NaN              | NaN              | NaN              | NaN              | NaN                 | 27,58628            | NaN                 | NaN                 | NaN                 | 26,07198        | NaN             | NaN             | NaN             | NaN             | 27,08071          | 27,36018          | NaN               | NaN               | NaN               | 26,82043 |
| <b>CSPG4</b>  | 25,03976         | NaN              | 25,75218         | NaN              | 26,00472         | NaN              | 25,36088         | NaN              | NaN              | NaN              | NaN                 | NaN                 | NaN                 | NaN                 | NaN                 | NaN             | NaN             | NaN             | NaN             | NaN             | NaN               | NaN               | NaN               | 24,44638          | 27,12849          | NaN      |
| <b>CCDC50</b> | NaN              | 21,40603         | NaN              | NaN              | NaN              | NaN              | NaN              | NaN              | NaN              | NaN              | NaN                 | NaN                 | 21,36137            | NaN                 | NaN                 | NaN             | NaN             | NaN             | NaN             | 22,3165         | NaN               | NaN               | NaN               | NaN               | NaN               | NaN      |
| <b>MITD1</b>  | NaN              | NaN              | 25,0471          | NaN              | NaN              | NaN              | NaN              | NaN              | NaN              | NaN              | NaN                 | NaN                 | NaN                 | NaN                 | NaN                 | NaN             | NaN             | NaN             | NaN             | NaN             | NaN               | NaN               | NaN               | NaN               | NaN               | NaN      |
| <b>MOV10</b>  | NaN              | NaN              | NaN              | 23,1823          | NaN              | NaN              | NaN              | NaN              | 26,86667         | NaN              | NaN                 | NaN                 | NaN                 | NaN                 | NaN                 | NaN             | NaN             | NaN             | NaN             | NaN             | NaN               | NaN               | NaN               | NaN               | NaN               | NaN      |
| <b>MKRN1</b>  | NaN              | NaN              | 28,35502         | NaN              | NaN              | NaN              | NaN              | NaN              | NaN              | NaN              | NaN                 | NaN                 | NaN                 | NaN                 | NaN                 | NaN             | NaN             | NaN             | NaN             | NaN             | NaN               | NaN               | NaN               | NaN               | NaN               | NaN      |
| <b>HEG1</b>   | NaN              | NaN              | NaN              | NaN              | 23,75898         | NaN              | NaN              | NaN              | NaN              | NaN              | NaN                 | NaN                 | NaN                 | NaN                 | NaN                 | NaN             | NaN             | NaN             | NaN             | NaN             | NaN               | NaN               | NaN               | 23,87202          | NaN               | NaN      |
| <b>EIF3F</b>  | NaN              | NaN              | NaN              | NaN              | NaN              | NaN              | NaN              | NaN              | 22,78692         | NaN              | NaN                 | NaN                 | NaN                 | NaN                 | NaN                 | NaN             | NaN             | NaN             | NaN             | NaN             | NaN               | NaN               | NaN               | NaN               | NaN               | NaN      |
| <b>CASK</b>   | NaN              | NaN              | 25,63032         | NaN              | 24,52928         | NaN              | NaN              | NaN              | 25,9896          | NaN              | NaN                 | NaN                 | 27,85816            | NaN                 | NaN                 | NaN             | NaN             | 24,90196        | NaN             | NaN             | NaN               | NaN               | NaN               | 25,0618           | NaN               | 23,21886 |
| <b>EIF3H</b>  | NaN              | 27,04708         | NaN              | 27,7107          | 27,09909         | NaN              | NaN              | 28,854           | 28,5823          | NaN              | NaN                 | NaN                 | NaN                 | NaN                 | NaN                 | NaN             | NaN             | NaN             | NaN             | NaN             | 25,96798          | NaN               | NaN               | NaN               | NaN               | NaN      |
| <b>AHSA1</b>  | NaN              | NaN              | NaN              | NaN              | NaN              | NaN              | NaN              | 24,92184         | NaN              | 23,98954         | NaN                 | NaN                 | NaN                 | NaN                 | NaN                 | NaN             | NaN             | NaN             | NaN             | NaN             | NaN               | NaN               | NaN               | NaN               | NaN               | NaN      |
| <b>ERBB2</b>  | NaN              | NaN              | NaN              | 26,18946         | NaN              | NaN              | NaN              | 26,09273         | 26,97727         | 26,82347         | 24,22685            | 24,19731            | NaN                 | 24,68998            | NaN                 | NaN             | NaN             | NaN             | NaN             | NaN             | NaN               | NaN               | 25,23436          | NaN               | 27,96168          | 26,40863 |
| <b>PRKCB</b>  | NaN              | NaN              | NaN              | NaN              | NaN              | NaN              | NaN              | NaN              | 24,84532         | NaN              | NaN                 | 23,40717            | NaN                 | NaN                 | NaN                 | NaN             | NaN             | NaN             | NaN             | NaN             | 22,86321          | NaN               | NaN               | NaN               | NaN               | NaN      |
| <b>EEF1G</b>  | NaN              | NaN              | NaN              | 26,61863         | NaN              | NaN              | 24,57259         | NaN              | 23,49911         | NaN              | NaN                 | NaN                 | NaN                 | NaN                 | NaN                 | 23,48124        | NaN             | 23,38284        | NaN             | NaN             | NaN               | NaN               | NaN               | NaN               | NaN               | NaN      |
| <b>PIK3R1</b> | NaN              | NaN              | NaN              | 24,66237         | NaN              | NaN              | NaN              | 25,23809         | NaN              | NaN              | NaN                 | NaN                 | NaN                 | NaN                 | NaN                 | NaN             | 23,36546        | NaN             | NaN             | NaN             | 24,30987          | NaN               | NaN               | NaN               | NaN               | NaN      |
| <b>STIP1</b>  | NaN              | NaN              | 23,63898         | 24,49387         | 25,45795         | 24,31741         | NaN              | 25,46756         | NaN              | NaN              | 26,85317            | NaN                 | 24,503              | 25,15592            | 24,83316            | 24,8541         | NaN             | NaN             | NaN             | NaN             | NaN               | NaN               | 25,51048          | 24,0141           | NaN               |          |
| <b>PHKA1</b>  | 25,06829         | NaN              | NaN              | NaN              | NaN              | NaN              | 25,00873         | 23,95358         | NaN              | 23,94315         | NaN                 | NaN                 | NaN                 | 24,07643            | NaN                 | NaN             | NaN             | NaN             | 24,65911        | NaN             | NaN               | 23,11607          | NaN               | NaN               | NaN               | NaN      |
| <b>GRB7</b>   | NaN              | 25,52367         | NaN              | 26,66058         | NaN              | NaN              | NaN              | NaN              | 28,40036         | NaN              | NaN                 | NaN                 | NaN                 | 24,85067            | NaN                 | 23,57531        | NaN             | NaN             | NaN             | NaN             | NaN               | NaN               | NaN               | 23,79035          | 23,35232          |          |
| <b>ECM29</b>  | NaN              | NaN              | NaN              | NaN              | 24,29502         | NaN              | NaN              | 25,00612         | NaN              | NaN              | NaN                 | NaN                 | NaN                 | NaN                 | NaN                 | NaN             | NaN             | NaN             | NaN             | NaN             | 24,69721          | NaN               | NaN               | NaN               | NaN               | NaN      |
| <b>GALNT7</b> | NaN              | NaN              | NaN              | NaN              | NaN              | NaN              | NaN              | NaN              | 24,37352         | NaN              | NaN                 | NaN                 | NaN                 | NaN                 | NaN                 | NaN             | NaN             | NaN             | NaN             | NaN             | 24,1747           | 25,28061          | NaN               | NaN               | NaN               | NaN      |
| <b>OTUB1</b>  | NaN              | 25,73407         | NaN              | NaN              | NaN              | NaN              | NaN              | 27,86012         | NaN              | NaN              | NaN                 | NaN                 | NaN                 | NaN                 | NaN                 | 25,24329        | 26,00112        | NaN             | 24,55262        | NaN             | 24,71931          | NaN               | 25,60589          | NaN               | 24,76436          |          |
| <b>SDSL</b>   | NaN              | NaN              | NaN              | NaN              | NaN              | NaN              | NaN              | NaN              | 25,63392         | NaN              | 24,6888             | NaN                 | NaN                 | NaN                 | NaN                 | NaN             | NaN             | NaN             | NaN             | NaN             | NaN               | NaN               | 24,38824          | NaN               | NaN               | NaN      |
| <b>CACYBP</b> | NaN              | 23,23155         | NaN              | NaN              | NaN              | NaN              | NaN              | NaN              | NaN              | 23,80607         | 24,50833            | NaN                 | 24,14725            | NaN                 | NaN                 | 24,36986        | NaN             | NaN             | 24,68024        | 24,06069        | NaN               | NaN               | NaN               | NaN               | NaN               | 24,75241 |
| <b>NANS</b>   | NaN              | NaN              | NaN              | NaN              | NaN              | NaN              | NaN              | 24,16584         | NaN              | NaN              | NaN                 | NaN                 | NaN                 | NaN                 | NaN                 | NaN             | NaN             | NaN             | NaN             | 25,78925        | NaN               | NaN               | NaN               | NaN               | NaN               | NaN      |
| <b>ARFGF2</b> | NaN              | NaN              | NaN              | 24,4729          | NaN              | 24,89832         | 25,37132         | NaN              | 25,63326         | 25,10984         | NaN                 | 24,24402            | NaN                 | 23,76263            | NaN                 | 23,74016        | NaN             | 25,90768        | 24,27234        | 25,67481        | NaN               | 23,86022          | NaN               | 25,00573          | NaN               |          |

## References

1. They, C. *et al.* Minimal information for studies of extracellular vesicles 2018 (MISEV2018): a position statement of the International Society for Extracellular Vesicles and update of the MISEV2014 guidelines. *J Extracell Vesicles* **7**, 1535750 (2018).
