# Supplementary material for: Proteomic profiling of extracellular vesicles allows for human breast cancer subtyping
Source: PubMed Central journal article supplement (PMC6722120; doi:10.1038/s42003-019-0570-8), 2019-09-03
Supplement: 42003_2019_570_MOESM2_ESM.pdf [file 42003_2019_570_MOESM2_ESM.pdf]

## Description of additional supplementary items

**Supplementary Data 1.** EV Protein groups file. List of the quantified EV proteins across the different EV samples, including the differentially expressed protein groups identified by ANOVA between the different EV subtypes.

**Supplementary Data 2.** EV phosphoproteome. List of all phosphosites quantified across all EVs with a localization probability  $>0.75$ . List of all quantified phosphosites of the EV phosphorylated kinases.

**Supplementary Data 3.** WCL Protein groups file. List of the quantified proteins across the different cell lines.
